# Supplementary material
Source: ML conference proceedings conference paper supplement (https://proceedings.neurips.cc/paper_files/paper/2015/hash/1579779b98ce9edb98dd85606f2c119d-Abstract.html)
Supplement: Supplementary file [file 1579779b98ce9edb98dd85606f2c119d-Supplemental.zip]

---

# Efficient Non-greedy Optimization of Decision Trees and Forests: Supplementary Material

---

Mohammad Norouzi<sup>1</sup>      Maxwell D. Collins<sup>2\*</sup>      Matthew Johnson<sup>3</sup>  
 David J. Fleet<sup>4</sup>      Pushmeet Kohli<sup>5</sup>

<sup>1,4</sup> Department of Computer Science, University of Toronto  
<sup>2</sup> Department of Computer Science, University of Wisconsin-Madison  
<sup>3,5</sup> Microsoft Research

## 1 Proofs

**Upper bound on loss.** For any pair  $(\mathbf{x}, y)$ , the loss  $\ell(\Theta^\top f(\text{sgn}(W\mathbf{x})), y)$  is upper bounded by:

$$\ell(\Theta^\top f(\text{sgn}(W\mathbf{x})), y) \leq \max_{\mathbf{g} \in \mathcal{H}^m} \{ \mathbf{g}^\top W\mathbf{x} + \ell(\Theta^\top f(\mathbf{g}), y) \} - \max_{\mathbf{h} \in \mathcal{H}^m} \{ \mathbf{h}^\top W\mathbf{x} \}. \quad (1)$$

*Proof.*

$$\begin{aligned}
 \text{RHS} &= \max_{\mathbf{g} \in \mathcal{H}^m} \{ \mathbf{g}^\top W\mathbf{x} + \ell(\Theta^\top f(\mathbf{g}), y) \} - \max_{\mathbf{h} \in \mathcal{H}^m} \{ \mathbf{h}^\top W\mathbf{x} \} \\
 &= \max_{\mathbf{g} \in \mathcal{H}^m} \{ \mathbf{g}^\top W\mathbf{x} + \ell(\Theta^\top f(\mathbf{g}), y) \} - \text{sgn}(W\mathbf{x})^\top W\mathbf{x} \\
 &\geq \max_{\mathbf{g} \in \{\text{sgn}(W\mathbf{x})\}} \{ \mathbf{g}^\top W\mathbf{x} + \ell(\Theta^\top f(\mathbf{g}), y) \} - \text{sgn}(W\mathbf{x})^\top W\mathbf{x} \\
 &= \text{sgn}(W\mathbf{x})^\top W\mathbf{x} + \ell(\Theta^\top f(\text{sgn}(W\mathbf{x})), y) - \text{sgn}(W\mathbf{x})^\top W\mathbf{x} \\
 &= \ell(\Theta^\top f(\text{sgn}(W\mathbf{x})), y) \\
 &= \text{LHS}
 \end{aligned}$$

□

**Proposition 1.** *The upper bound on the loss becomes tighter as a constant multiple of  $W$  gets larger. More formally, for any  $\alpha > \beta > 0$ , we have:*

$$\begin{aligned}
 \max_{\mathbf{g} \in \mathcal{H}^m} \{ \alpha \mathbf{g}^\top W\mathbf{x} + \ell(\Theta^\top f(\mathbf{g}), y) \} - \max_{\mathbf{h} \in \mathcal{H}^m} \{ \alpha \mathbf{h}^\top W\mathbf{x} \} &\leq \\
 \max_{\mathbf{g}' \in \mathcal{H}^m} \{ \beta \mathbf{g}'^\top W\mathbf{x} + \ell(\Theta^\top f(\mathbf{g}'), y) \} - \max_{\mathbf{h}' \in \mathcal{H}^m} \{ \beta \mathbf{h}'^\top W\mathbf{x} \}. &\quad (2)
 \end{aligned}$$

*Proof.* Let

$$\hat{\mathbf{g}}_\alpha = \operatorname{argmax}_{\mathbf{g} \in \mathcal{H}^m} \{ \alpha \mathbf{g}^\top W\mathbf{x} + \ell(\Theta^\top f(\mathbf{g}), y) \}, \quad \hat{\mathbf{g}}_\beta = \operatorname{argmax}_{\mathbf{g} \in \mathcal{H}^m} \{ \beta \mathbf{g}^\top W\mathbf{x} + \ell(\Theta^\top f(\mathbf{g}), y) \},$$

then we have:

$$\beta \hat{\mathbf{g}}_\alpha^\top W\mathbf{x} + \ell(\Theta^\top f(\hat{\mathbf{g}}_\alpha), y) \leq \beta \hat{\mathbf{g}}_\beta^\top W\mathbf{x} + \ell(\Theta^\top f(\hat{\mathbf{g}}_\beta), y). \quad (3)$$

We also have:

$$\max_{\mathbf{h} \in \mathcal{H}^m} \{ \alpha \mathbf{h}^\top W\mathbf{x} \} = \alpha \text{sgn}(W\mathbf{x})^\top W\mathbf{x}, \quad \text{and} \quad \max_{\mathbf{h} \in \mathcal{H}^m} \{ \beta \mathbf{h}^\top W\mathbf{x} \} = \beta \text{sgn}(W\mathbf{x})^\top W\mathbf{x}. \quad (4)$$

Moreover,

$$\begin{aligned}
\hat{\mathbf{g}}_\alpha^\top W\mathbf{x} &\leq \text{sgn}(W\mathbf{x})^\top W\mathbf{x} \implies \\
(\alpha - \beta) \hat{\mathbf{g}}_\alpha^\top W\mathbf{x} &\leq (\alpha - \beta) \text{sgn}(W\mathbf{x})^\top W\mathbf{x} \implies \\
(\alpha - \beta) \hat{\mathbf{g}}_\alpha^\top W\mathbf{x} - \alpha \text{sgn}(W\mathbf{x})^\top W\mathbf{x} &\leq -\beta \text{sgn}(W\mathbf{x})^\top W\mathbf{x} .
\end{aligned} \tag{5}$$

Now, summing the two sides of (3) and (5), and using (4), the inequality is proved.  $\square$
